# Supplementary material for: Analysis of channel uncertainty in ARQ relay networks
Source: PLoS One. 2018 Jan 29;13(1):e0190622. doi: 10.1371/journal.pone.0190622 (PMC5788354; doi:10.1371/journal.pone.0190622)
Supplement: S2 File — (XLSX) [file pone.0190622.s002.xlsx]

## Sheet: PowerConsumedindB
Omega
0.001	0.002	0.003	0.004	0.005	0.006	0.007	0.008	0.009	0.01	0.02	0.03	0.04	0.05	0.06	0.07	0.08	0.09	0.1	0.15	0.2	0.25	0.3	0.35	0.4	0.45	0.5
NumPilots = 5: Over all Omegas: SNR=-5
2.10344	2.10344	2.10344	2.10344	2.10344	2.10344	2.10344	2.10344	2.10344	2.10344	2.10344	2.10344	2.10344	2.10344	2.10344	2.10344	2.10344	2.10344	2.10344	2.10344	2.10344	2.10344	2.10344	2.10344	2.10344	2.10344	2.10344
NumPilots = 15: Over all Omegas: SNR=-5
0.807831	0.807831	0.807831	0.807831	0.807831	0.807831	0.807831	0.807831	0.807831	0.807831	0.807831	0.807831	0.807831	0.807831	0.807831	0.807831	0.807831	0.807831	0.807831	0.807831	0.807831	0.807831	0.807831	0.807831	0.807831	0.807831	0.807831
NumPilots = 45: Over all Omegas: SNR=-5
0.084492	0.084492	0.084492	0.084492	0.084492	0.084492	0.084492	0.084492	0.084492	0.084492	0.084492	0.084492	0.084492	0.084492	0.084492	0.084492	0.084492	0.084492	0.084492	0.084492	0.084492	0.084492	0.084492	0.084492	0.084492	0.084492	0.084492
NumPilots = 90: Over all Omegas: SNR=-5
-0.11119	-0.11119	-0.11119	-0.11119	-0.11119	-0.11119	-0.11119	-0.11119	-0.11119	-0.11119	-0.11119	-0.11119	-0.11119	-0.11119	-0.11119	-0.11119	-0.11119	-0.11119	-0.11119	-0.11119	-0.11119	-0.11119	-0.11119	-0.11119	-0.11119	-0.11119	-0.11119
NumPilots = 200: Over all Omegas: SNR=-5
-0.301481	-0.301481	-0.301481	-0.301481	-0.301481	-0.301481	-0.301481	-0.301481	-0.301481	-0.301481	-0.301481	-0.301481	-0.301481	-0.301481	-0.301481	-0.301481	-0.301481	-0.301481	-0.301481	-0.301481	-0.301481	-0.301481	-0.301481	-0.301481	-0.301481	-0.301481	-0.301481
NumPilots = 5000: Over all Omegas: SNR=-5
-0.501878	-0.501878	-0.501878	-0.501878	-0.501878	-0.501878	-0.501878	-0.501878	-0.501878	-0.501878	-0.501878	-0.501878	-0.501878	-0.501878	-0.501878	-0.501878	-0.501878	-0.501878	-0.501878	-0.501878	-0.501878	-0.501878	-0.501878	-0.501878	-0.501878	-0.501878	-0.501878

## Sheet: Throughput
Omega
0.001	0.002	0.003	0.004	0.005	0.006	0.007	0.008	0.009	0.01	0.02	0.03	0.04	0.05	0.06	0.07	0.08	0.09	0.1	0.15	0.2	0.25	0.3	0.35	0.4	0.45	0.5
NumPilots = 5: Over all Omegas: SNR=-5
0.0932498	0.0922537	0.0926502	0.0937469	0.0933846	0.0954117	0.0940235	0.0940798	0.0938124	0.0944601	0.097619	0.0973082	0.0957752	0.0953305	0.0960041	0.0962526	0.098436	0.0989424	0.0992472	0.0995022	0.100096	0.0991269	0.0993125	0.100502	0.0996369	0.0985154	0.0998824
NumPilots = 15: Over all Omegas: SNR=-5
0.112852	0.115316	0.116387	0.117464	0.119293	0.120946	0.119946	0.121992	0.120198	0.121859	0.121628	0.12031	0.12529	0.123016	0.125519	0.12591	0.124775	0.125831	0.123359	0.125942	0.122916	0.125355	0.128269	0.124169	0.123333	0.123232	0.122747
NumPilots = 45: Over all Omegas: SNR=-5
0.13813	0.138161	0.140146	0.136972	0.135139	0.13956	0.138798	0.139212	0.141459	0.140318	0.140227	0.142857	0.142251	0.142774	0.143756	0.144451	0.143605	0.143099	0.143893	0.142513	0.141391	0.142337	0.140905	0.142357	0.138406	0.138149	0.138082
NumPilots = 90: Over all Omegas: SNR=-5
0.145433	0.149036	0.148059	0.148391	0.148159	0.150123	0.149526	0.150437	0.149693	0.151209	0.151775	0.151174	0.153714	0.150384	0.150922	0.151148	0.149454	0.149962	0.152083	0.148902	0.150185	0.14552	0.146604	0.146296	0.145753	0.144513	0.141924
NumPilots = 200: Over all Omegas: SNR=-5
0.153176	0.155213	0.15466	0.155069	0.154734	0.15645	0.157164	0.156394	0.156976	0.158513	0.154826	0.155047	0.154387	0.155411	0.154488	0.154974	0.154198	0.1541	0.152232	0.153882	0.152164	0.152346	0.149012	0.149855	0.150313	0.146109	0.14535
NumPilots = 5000: Over all Omegas: SNR=-5
0.16192	0.161097	0.159779	0.161169	0.161134	0.160033	0.159209	0.159398	0.15968	0.160536	0.162182	0.160174	0.160039	0.160869	0.159642	0.15953	0.157615	0.159039	0.157501	0.156424	0.155186	0.155932	0.154835	0.152806	0.153042	0.150161	0.149099
